# Supplementary material for: Modulating melting points in micellar cores: influence of the corona chain length on the core confinement in binary mixed block copolymer micelles
Source: Royal Society of Chemistry journal article supplement (doi:10.1039/d4sm01303d), 2025-01-01
Supplement: d4sm01303d1.pdf [file d4sm01303d1.pdf]

## Supporting Information

### **Modulating Melting Points in Micellar Cores: Influence of Corona Chain Length on the Core Confinement in Binary Mixed Block Copolymer Micelles**

*Szymon M. Szostak, Nico König, Lutz Willner and Reidar Lund\**

S. M. Szostak, N. König, R. Lund  
Department of Chemistry, University of Oslo,  
P.O. Box 1033 Blindern,  
0315 Oslo, Norway  
E-mail: reidar.lund@kjemi.uio.no

L. Willner  
Jülich Centre for Neutron Science (JCNS-1), Forschungszentrum Jülich GmbH, 52425 Jülich,  
Germany

Table S1. Fitting parameters determined for the C28PEOx micelles at 20 °C, BM29 measurements

| Sample      | $N_{agg}$ | $R_g^1$ [Å] | $R_g^2$ [Å] | $R_g$ [Å] | sigma_int | nu   | sigma | df  | coeff | $f_{core}$ | $d_{core}$ | $d_{shell}$ | $d_{solv}$ | $M_{core}$ | $M_{shell1}$ | $M_{shell2}$ | psi    | $R_c$ [Å] | conc |
|-------------|-----------|-------------|-------------|-----------|-----------|------|-------|-----|-------|------------|------------|-------------|------------|------------|--------------|--------------|--------|-----------|------|
| PEO3        | 150       | 88,0        | -           | 20,3      | 5         | 51,3 | 0,1   | 1,7 | 1,33  | 1          | 0,92       | 1,21        | 0,9982     | 393        | 2300         | -            | 1      | 29,3      | 2,5  |
| PEO3/5 1:1  | 147       | 84,0        | 114,7       | 24,3      | 5         | 9,0  | 0,1   | 1,7 | 1,33  | 1          | 0,92       | 1,21        | 0,9982     | 393        | 2300         | 4600         | 0,6494 | 29,2      | 2,5  |
| PEO3/10 1:1 | 129       | 82,0        | 141,9       | 28        | 5         | 1,4  | 0,1   | 1,7 | 1,33  | 1          | 0,95       | 1,21        | 0,9982     | 393        | 2300         | 9600         | 0,7874 | 27,6      | 2,5  |
| PEO5        | 111       | 114,7       | -           | 30,6      | 5         | 30,9 | 0,1   | 1,7 | 1,33  | 1          | 0,90       | 1,21        | 0,9982     | 393        | 4600         | -            | 1      | 26,8      | 1,25 |
| PEO5/10 1:1 | 111       | 132,0       | 151,4       | 45,2      | 5         | 2,9  | 0,1   | 1,7 | 1,33  | 1          | 0,95       | 1,21        | 0,9982     | 393        | 4600         | 9600         | 0,6667 | 26,3      | 2,5  |
| PEO5/10 1:2 | 116       | 140,2       | 161,9       | 48,7      | 5         | 3,4  | 0,1   | 1,7 | 1,33  | 1          | 0,95       | 1,21        | 0,9982     | 393        | 4600         | 9600         | 0,5    | 26,7      | 1,25 |
| PEO5/20 1:1 | 88        | 108         | 185,0       | 50,0      | 5         | 2,8  | 0,1   | 1,7 | 1,33  | 1          | 0,95       | 1,21        | 0,9982     | 393        | 4600         | 21400        | 0,8134 | 24,3      | 1,25 |
| PEO10       | 73        | 163,5       | -           | 47        | 5         | 8,2  | 0,1   | 1,7 | 1,33  | 1          | 0,98       | 1,21        | 0,9982     | 393        | 9600         | -            | 1      | 22,6      | 2,5  |
| PEO3/20 1:7 | 69        | 118,7       | 219,6       | 73,0      | 5         | 0,2  | 0,1   | 1,7 | 1,33  | 1          | 0,98       | 1,21        | 0,9982     | 393        | 2300         | 21400        | 0,5356 | 22,2      | 2,5  |
| PEO5/20 1:4 | 77        | 100,0       | 195,0       | 55,0      | 5         | 3,8  | 0,1   | 1,7 | 1,33  | 1          | 0,92       | 1,21        | 0,9982     | 393        | 4600         | 21400        | 0,5215 | 23,5      | 2,5  |
| PEO20       | 42        | 229,4       | -           | 75        | 5         | 7,8  | 0,1   | 1,7 | 1,33  | 1          | 0,98       | 1,21        | 0,9982     | 393        | 21400        | -            | 1      | 18,8      | 2,5  |

Table S2. Fitting parameters determined for the C28PEOx micelles at 20 °C – 60 °C, NanoStar measurements

| Sample      | Temp | $N_{agg}$ | $R_m^1$ [Å] | $R_m^2$ [Å] | $R_g$ [Å] | sigma_int | nu    | bgr      | sigma | df  | coeff | $f_{core}$ | $d_{core}$ | $d_{shell}$ | $d_{solv}$ | $M_{core}$ | $M_{shell1}$ | $M_{shell2}$ | psi     | $R_c$ [Å] | conc |
|-------------|------|-----------|-------------|-------------|-----------|-----------|-------|----------|-------|-----|-------|------------|------------|-------------|------------|------------|--------------|--------------|---------|-----------|------|
| PEO3        | 20   | 157       | 83,1        | -           | 20,3      | 13        | 0,1   | 5,00E-04 | 0,1   | 1,7 | 1,33  | 1          | 0,91       | 1,21        | 0,9982     | 393        | 2300         | -            | 1       | 29,9      | 5    |
|             | 30   | 166       | 77,9        | -           | 20,3      | 13        | 8,8   | 5,00E-04 | 0,1   | 1,7 | 1,33  | 1          | 0,87       | 1,2         | 0,99547    | 393        | 2300         | -            | 1       | 31,0      | 5    |
|             | 40   | 157       | 79,2        | -           | 20,3      | 13        | 0,0   | 5,00E-04 | 0,1   | 1,7 | 1,33  | 1          | 0,87       | 1,19        | 0,99221    | 393        | 2300         | -            | 1       | 30,4      | 5    |
|             | 45   | 164       | 75,8        | -           | 20,3      | 13        | 8,8   | 5,00E-04 | 0,1   | 1,7 | 1,33  | 1          | 0,85       | 1,184       | 0,99021    | 393        | 2300         | -            | 1       | 31,1      | 5    |
|             | 50   | 176       | 72,7        | -           | 20,3      | 13        | 6,1   | 5,00E-04 | 0,1   | 1,7 | 1,33  | 1          | 0,81       | 1,179       | 0,98803    | 393        | 2300         | -            | 1       | 32,4      | 5    |
|             | 55   | 179       | 73,0        | -           | 20,3      | 13        | 0,0   | 5,00E-04 | 0,1   | 1,7 | 1,33  | 1          | 0,75       | 1,175       | 0,98569    | 393        | 2300         | -            | 1       | 33,3      | 5    |
| PEO5        | 20   | 108       | 110,7       | -           | 30,6      | 13        | 3,5   | 5,00E-04 | 0,1   | 1,7 | 1,33  | 1          | 0,92       | 1,21        | 0,9982     | 393        | 4600         | -            | 1       | 26,4      | 5    |
|             | 30   | 111       | 106,4       | -           | 30,6      | 13        | 9,1   | 5,00E-04 | 0,1   | 1,7 | 1,33  | 1          | 0,87       | 1,2         | 0,99565    | 393        | 4600         | -            | 1       | 27,1      | 5    |
|             | 40   | 110       | 103,7       | -           | 30,6      | 13        | 8,1   | 5,00E-04 | 0,1   | 1,7 | 1,33  | 1          | 0,86       | 1,19        | 0,99221    | 393        | 4600         | -            | 1       | 27,1      | 5    |
|             | 45   | 113       | 101,6       | -           | 30,6      | 13        | 21,5  | 5,00E-04 | 0,1   | 1,7 | 1,33  | 1          | 0,84       | 1,184       | 0,99021    | 393        | 4600         | -            | 1       | 27,6      | 5    |
|             | 50   | 116       | 99,2        | -           | 30,6      | 13        | 1,7   | 5,00E-04 | 0,1   | 1,7 | 1,33  | 1          | 0,76       | 1,179       | 0,98803    | 393        | 4600         | -            | 1       | 28,8      | 5    |
|             | 55   | 115       | 99,0        | -           | 30,6      | 13        | 0,7   | 5,00E-04 | 0,1   | 1,7 | 1,33  | 1          | 0,76       | 1,174       | 0,98569    | 393        | 4600         | -            | 1       | 28,7      | 5    |
| PEO10       | 20   | 67        | 150,2       | -           | 47,2      | 13        | 5,4   | 5,00E-04 | 0,1   | 1,7 | 1,33  | 1          | 0,89       | 1,21        | 0,9982     | 393        | 9600         | -            | 1       | 22,7      | 5    |
|             | 30   | 66        | 149,0       | -           | 47,2      | 13        | 4,4   | 5,00E-04 | 0,1   | 1,7 | 1,33  | 1          | 0,91       | 1,2         | 0,99565    | 393        | 9600         | -            | 1       | 22,4      | 5    |
|             | 40   | 63        | 151,2       | -           | 47,2      | 13        | 7,6   | 5,00E-04 | 0,1   | 1,7 | 1,33  | 1          | 0,97       | 1,19        | 0,99221    | 393        | 9600         | -            | 1       | 21,6      | 5    |
|             | 45   | 66        | 136,5       | -           | 47,2      | 13        | 9,7   | 5,00E-04 | 0,1   | 1,7 | 1,33  | 1          | 0,77       | 1,184       | 0,99021    | 393        | 9600         | -            | 1       | 23,6      | 5    |
|             | 50   | 63        | 143,0       | -           | 47,2      | 13        | 3,5   | 5,00E-04 | 0,1   | 1,7 | 1,33  | 1          | 0,82       | 1,179       | 0,98803    | 393        | 9600         | -            | 1       | 22,9      | 5    |
|             | 55   | 63        | 136,9       | -           | 47,2      | 13        | 2,2   | 5,00E-04 | 0,1   | 1,7 | 1,33  | 1          | 0,78       | 1,174       | 0,98569    | 393        | 9600         | -            | 1       | 23,2      | 5    |
| PEO20       | 20   | 36        | 209,9       | -           | 75        | 13        | 8,8   | 5,00E-04 | 0,1   | 1,7 | 1,33  | 1          | 0,95       | 1,21        | 0,9982     | 393        | 21400        | -            | 1       | 18,0      | 5    |
|             | 30   | 34        | 202,7       | -           | 75        | 13        | 13,3  | 5,00E-04 | 0,1   | 1,7 | 1,33  | 1          | 0,95       | 1,2         | 0,99565    | 393        | 21400        | -            | 1       | 17,7      | 5    |
|             | 40   | 37        | 204,3       | -           | 75        | 13        | 18,7  | 5,00E-04 | 0,1   | 1,7 | 1,33  | 1          | 0,95       | 1,19        | 0,99221    | 393        | 21400        | -            | 1       | 18,2      | 5    |
|             | 45   | 35        | 198,7       | -           | 75        | 13        | 10,3  | 5,00E-04 | 0,1   | 1,7 | 1,33  | 1          | 0,95       | 1,184       | 0,99021    | 393        | 21400        | -            | 1       | 17,9      | 5    |
|             | 50   | 35        | 196,0       | -           | 75        | 13        | 12,6  | 5,00E-04 | 0,1   | 1,7 | 1,33  | 1          | 0,95       | 1,179       | 0,98803    | 393        | 21400        | -            | 1       | 17,9      | 5    |
|             | 55   | 34        | 193,9       | -           | 75        | 13        | 7,1   | 5,00E-04 | 0,1   | 1,7 | 1,33  | 1          | 0,95       | 1,175       | 0,98569    | 393        | 21400        | -            | 1       | 17,8      | 5    |
| PEO3/5 1:1  | 20   | 144       | 82,3        | 113,5       | 25,0      | 5         | 1,4   | 5,00E-04 | 0,1   | 1,7 | 1,33  | 1          | 0,92       | 1,21        | 0,9982     | 393        | 2300         | 4600         | 0,6494  | 29,0      | 5    |
|             | 30   | 142       | 83,9        | 111,1       | 25,0      | 5         | 12,5  | 5,00E-04 | 0,1   | 1,7 | 1,33  | 1          | 0,91       | 1,2         | 0,99565    | 393        | 2300         | 4600         | 0,6494  | 29,0      | 5    |
|             | 40   | 138       | 82,5        | 109,5       | 25,0      | 5         | 10,0  | 5,00E-04 | 0,1   | 1,7 | 1,33  | 1          | 0,90       | 1,19        | 0,99221    | 393        | 2300         | 4600         | 0,6494  | 28,9      | 5    |
|             | 45   | 139       | 84,0        | 106,8       | 25,0      | 5         | 153,8 | 5,00E-04 | 0,1   | 1,7 | 1,33  | 1          | 0,88       | 1,184       | 0,99021    | 393        | 2300         | 4600         | 0,6494  | 29,0      | 5    |
|             | 50   | 138       | 84,7        | 103,3       | 25,0      | 5         | 120,7 | 5,00E-04 | 0,1   | 1,7 | 1,33  | 1          | 0,85       | 1,179       | 0,98803    | 393        | 2300         | 4600         | 0,6494  | 29,4      | 5    |
|             | 55   | 139       | 83,2        | 101,4       | 25,0      | 5         | 2,4   | 5,00E-04 | 0,1   | 1,7 | 1,33  | 1          | 0,79       | 1,174       | 0,98569    | 393        | 2300         | 4600         | 0,6494  | 30,1      | 5    |
| PEO3/10 1:1 | 20   | 128       | 80,8        | 141,0       | 27,9      | 5         | 0,2   | 5,00E-04 | 0,1   | 1,7 | 1,33  | 1          | 0,95       | 1,21        | 0,9982     | 393        | 2300         | 9600         | 0,7874  | 27,6      | 5    |
|             | 30   | 125       | 83,1        | 140,8       | 27,9      | 5         | 0,3   | 5,00E-04 | 0,1   | 1,7 | 1,33  | 1          | 0,95       | 1,2         | 0,99565    | 393        | 2300         | 9600         | 0,7874  | 27,4      | 5    |
|             | 40   | 121       | 76,9        | 131,8       | 47,4      | 5         | 0,0   | 5,00E-04 | 0,1   | 1,7 | 1,33  | 1          | 0,90       | 1,19        | 0,99221    | 393        | 2300         | 9600         | 0,7874  | 27,6      | 5    |
|             | 45   | 123       | 79,9        | 133,2       | 46,9      | 5         | 0,0   | 5,00E-04 | 0,1   | 1,7 | 1,33  | 1          | 0,90       | 1,184       | 0,99021    | 393        | 2300         | 9600         | 0,7874  | 27,7      | 5    |
|             | 50   | 128       | 76,1        | 127,9       | 35,0      | 5         | 0,3   | 5,00E-04 | 0,1   | 1,7 | 1,33  | 1          | 0,82       | 1,179       | 0,98803    | 393        | 2300         | 9600         | 0,7874  | 28,9      | 5    |
|             | 55   | 125       | 75,1        | 124,4       | 32,5      | 5         | 0,5   | 5,00E-04 | 0,1   | 1,7 | 1,33  | 1          | 0,79       | 1,174       | 0,98569    | 393        | 2300         | 9600         | 0,7874  | 29,1      | 5    |
| PEO3/20 1:7 | 20   | 60        | 106,6       | 204,6       | 75,2      | 5         | 0,0   | 5,00E-04 | 0,1   | 1,7 | 1,33  | 1          | 0,95       | 1,21        | 0,9982     | 393        | 2300         | 21400        | 0,5356  | 21,4      | 5    |
|             | 30   | 60        | 108,0       | 202,3       | 76,7      | 5         | 0,0   | 5,00E-04 | 0,1   | 1,7 | 1,33  | 1          | 0,95       | 1,2         | 0,99565    | 393        | 2300         | 21400        | 0,5356  | 21,4      | 5    |
|             | 40   | 61        | 110,9       | 201,1       | 78,9      | 5         | 0,0   | 5,00E-04 | 0,1   | 1,7 | 1,33  | 1          | 0,95       | 1,19        | 0,99221    | 393        | 2300         | 21400        | 0,5356  | 21,6      | 5    |
|             | 45   | 58        | 137,4       | 195,3       | 75,2      | 5         | 0,8   | 5,00E-04 | 0,1   | 1,7 | 1,33  | 1          | 0,95       | 1,184       | 0,99021    | 393        | 2300         | 21400        | 0,5356  | 21,1      | 5    |
|             | 50   | 58        | 137,9       | 186,8       | 70,2      | 5         | 0,0   | 5,00E-04 | 0,1   | 1,7 | 1,33  | 1          | 0,82       | 1,179       | 0,98803    | 393        | 2300         | 21400        | 0,5356  | 22,2      | 5    |
|             | 55   | 57        | 120,1       | 184,9       | 66,5      | 5         | 0,0   | 5,00E-04 | 0,1   | 1,7 | 1,33  | 1          | 0,81       | 1,174       | 0,98569    | 393        | 2300         | 21400        | 0,5356  | 22,2      | 5    |
| PEO5/10 1:1 | 20   | 108       | 136,5       | 147,3       | 36,7      | 5         | 1,1   | 5,00E-04 | 0,1   | 1,7 | 1,33  | 1          | 0,95       | 1,21        | 0,9982     | 393        | 4600         | 9600         | 0,66667 | 26,0      | 5    |
|             | 30   | 106       | 113,8       | 156,8       | 36,7      | 5         | 4,1   | 5,00E-04 | 0,1   | 1,7 | 1,33  | 1          | 0,95       | 1,2         | 0,99565    | 393        | 4600         | 9600         | 0,66667 | 25,9      | 5    |
|             | 40   | 103       | 111,8       | 156,6       | 36,7      | 5         | 4,5   | 5,00E-04 | 0,1   | 1,7 | 1,33  | 1          | 0,95       | 1,19        | 0,99221    | 393        | 4600         | 9600         | 0,66667 | 25,6      | 5    |
|             | 45   | 98        | 135,8       | 138,8       | 36,7      | 5         | 3,4   | 5,00E-04 | 0,1   | 1,7 | 1,33  | 1          | 0,95       | 1,184       | 0,99021    | 393        | 4600         | 9600         | 0,66667 | 25,2      | 5    |
|             | 50   | 104       | 105,8       | 147,8       | 36,7      | 5         | 1,0   | 5,00E-04 | 0,1   | 1,7 | 1,33  | 1          | 0,82       | 1,179       | 0,98803    | 393        | 4600         | 9600         | 0,66667 | 27,0      | 5    |
|             | 55   | 102       | 105,2       | 136,4       | 36,7      | 5         | 11,9  | 5,00E-04 | 0,1   | 1,7 | 1,33  | 1          | 0,77       | 1,174       | 0,98569    | 393        | 4600         | 9600         | 0,66667 | 27,4      | 5    |
| PEO5/10 1:2 | 20   | 119       | 102,8       | 167,4       | 39,5      | 5         | 7,1   | 5,00E-04 | 0,1   | 1,7 | 1,33  | 1          | 0,95       | 1,21        | 0,9982     | 393        | 4600         | 9600         | 0,5     | 26,9      | 5    |
|             | 30   | 119       | 89,8        | 165,4       | 39,5      | 5         | 8,7   | 5,00E-04 | 0,1   | 1,7 | 1,33  | 1          | 0,95       | 1,2         | 0,99565    | 393        | 4600         | 9600         | 0,5     | 27,0      | 5    |
|             | 40   | 119       | 98,1        | 164,4       | 39,5      | 5         | 4,3   | 5,00E-04 | 0,1   | 1,7 | 1,33  | 1          | 0,95       | 1,19        | 0,99221    | 393        | 4600         | 9600         | 0,5     | 26,9      | 5    |
|             | 45   | 118       | 96,3        | 159,2       | 39,0      | 5         | 6,8   | 5,00E-04 | 0,1   | 1,7 | 1,33  | 1          | 0,92       | 1,184       | 0,99021    | 393        | 4600         | 9600         | 0,5     | 27,1      | 5    |
|             | 50   | 117       | 101,7       | 155,9       | 39,0      | 5         | 1,3   | 5,00E-04 | 0,1   | 1,7 | 1,33  | 1          | 0,83       | 1,179       | 0,98803    | 393        |              |              |         |           |      |

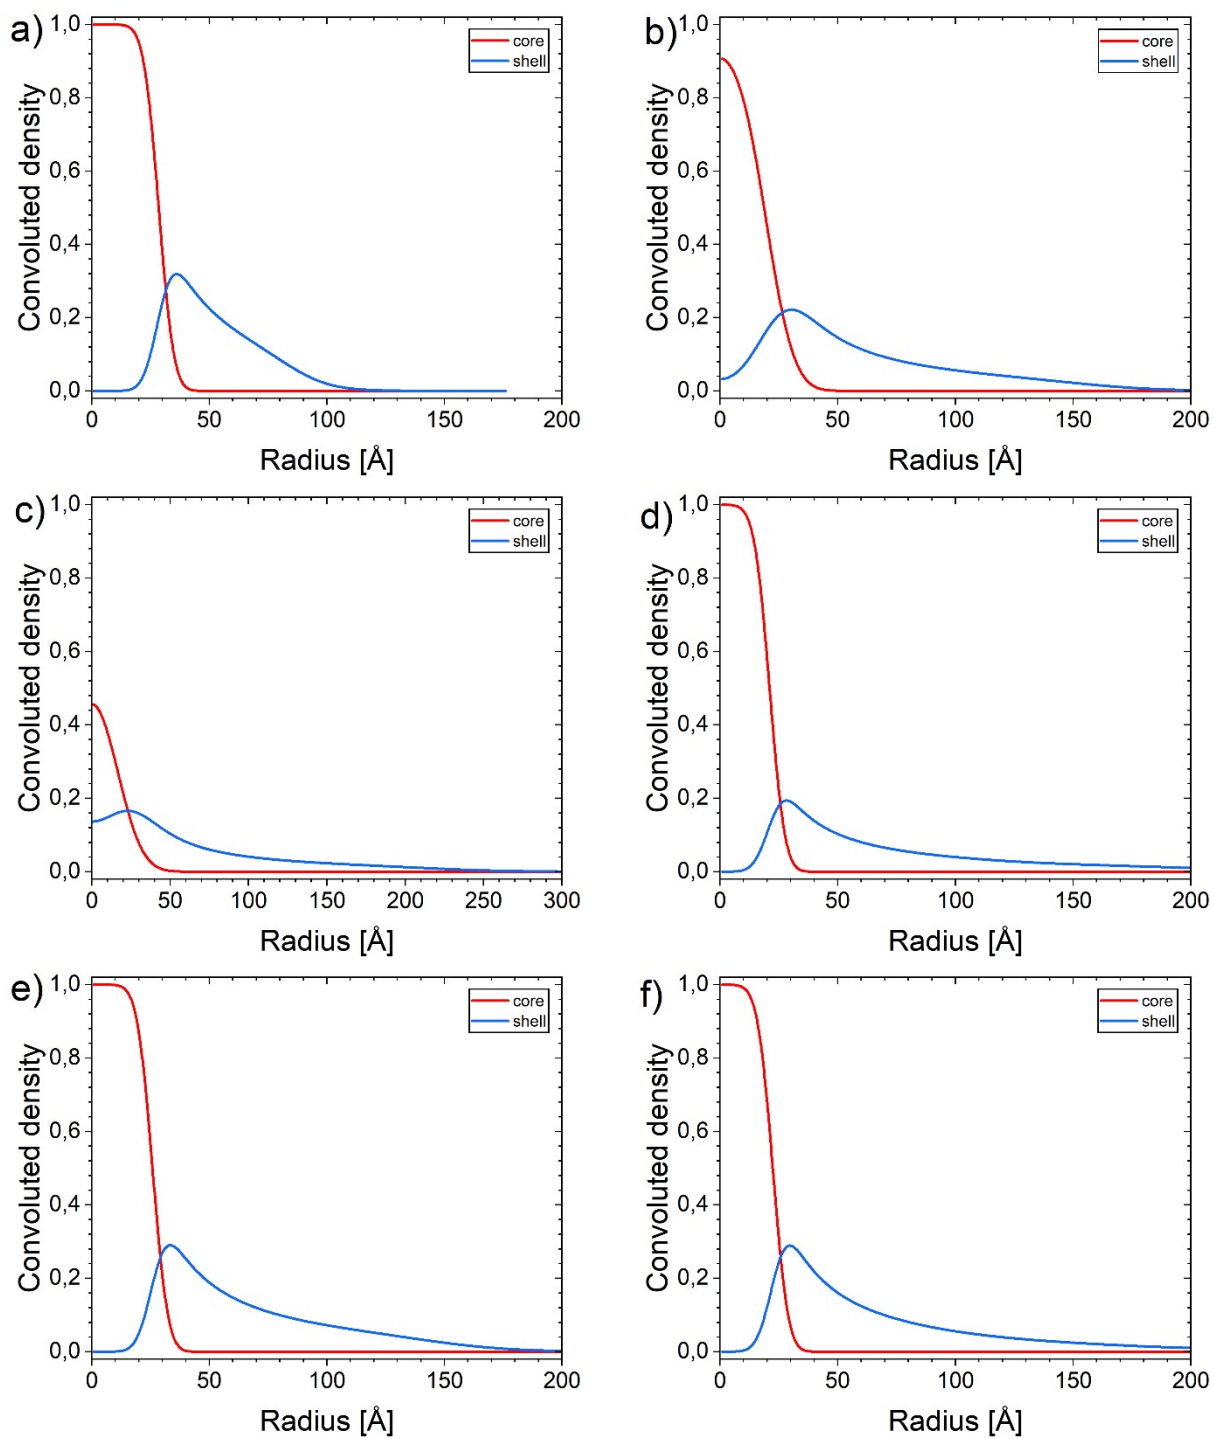

Figure S1. The convoluted density as a function of micelle radius with the distinction of core and shell contribution, calculated from the structural parameters after fitting of SAXS data, a)  $C_{28}$ -PEO3, b)  $C_{28}$ -PEO10, c)  $C_{28}$ -PEO20, d)  $C_{28}$ -PEO3/20 1:7, e)  $C_{28}$ -PEO5/10 1:2, f)  $C_{28}$ -PEO5/20 1:4

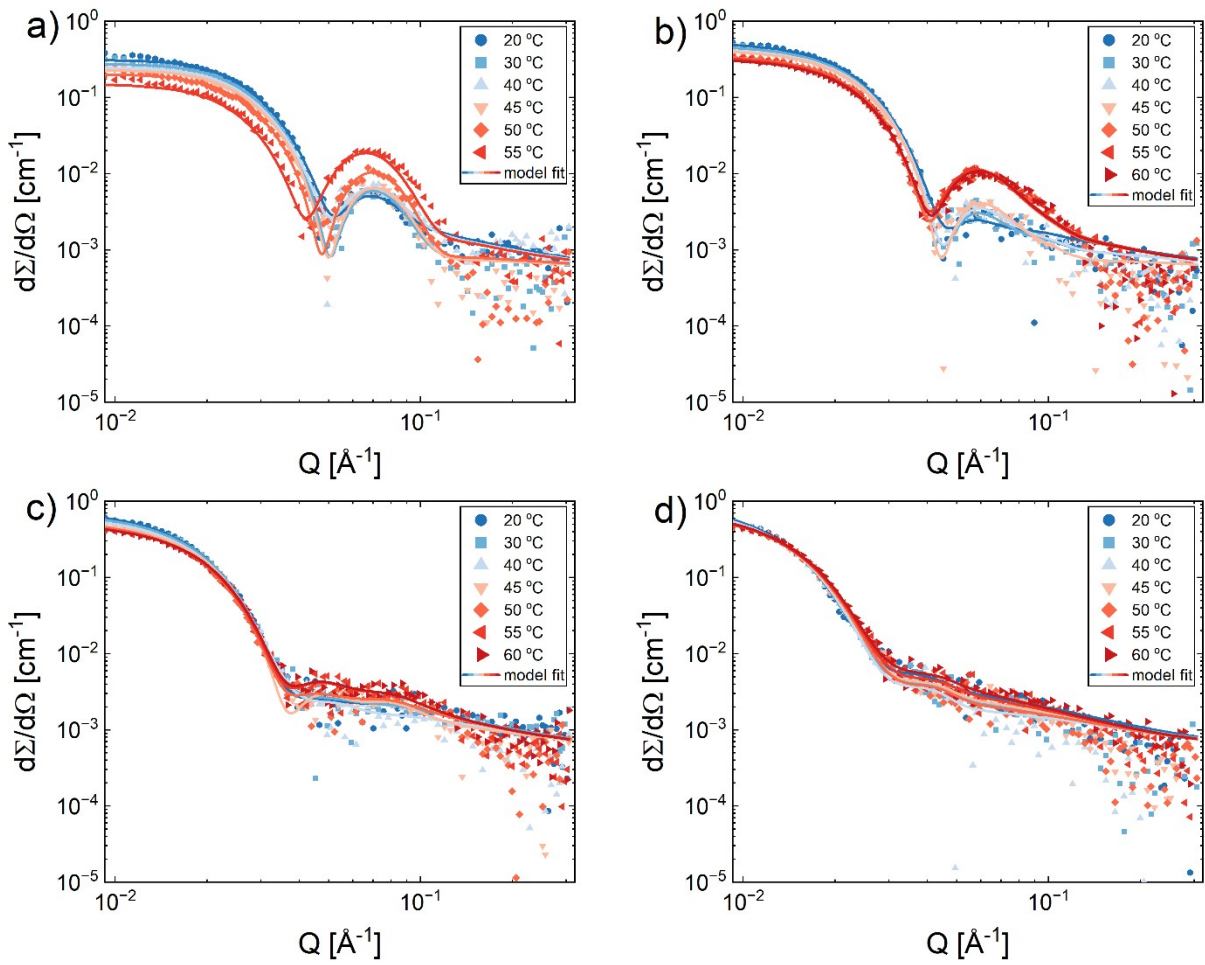

Figure S2. SAXS curves of a) C<sub>28</sub>-PEO<sub>3</sub>, b) C<sub>28</sub>-PEO<sub>5</sub>, c) C<sub>28</sub>-PEO<sub>10</sub>, d) C<sub>28</sub>-PEO<sub>20</sub> as a function of temperature ranging from 20 °C to 60 °C at 0.5 vol% polymer concentration. Solid lines represent the model fits.

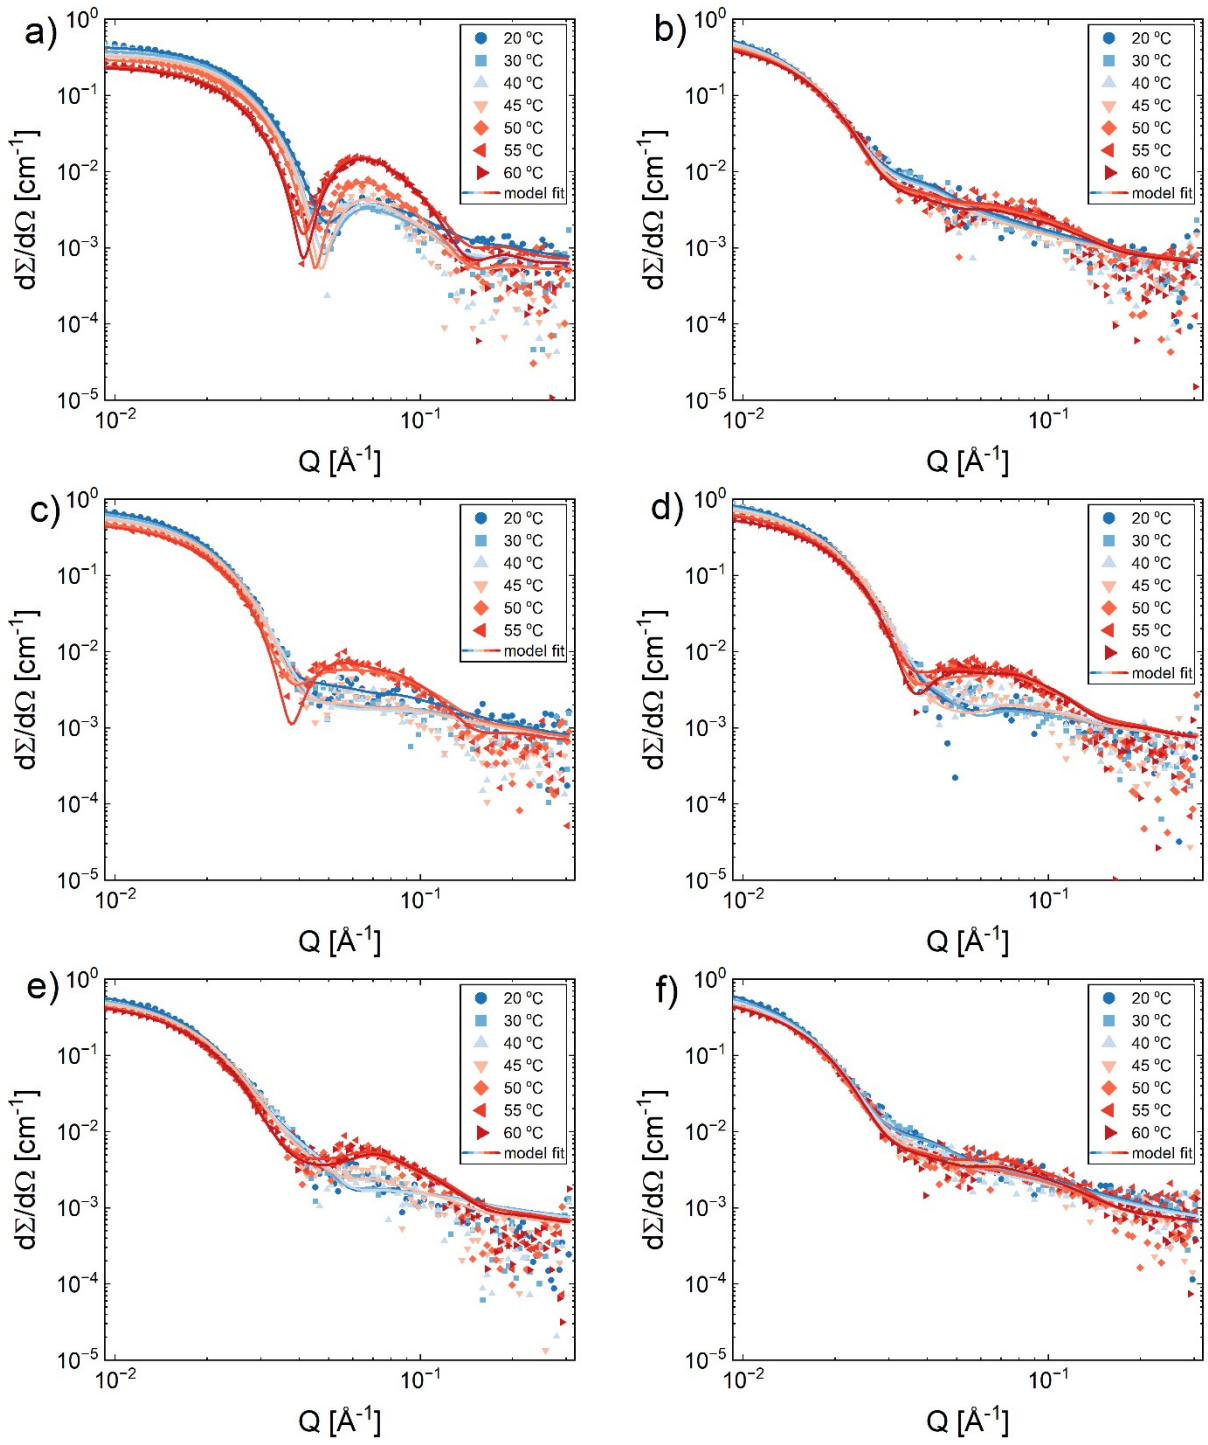

Figure S3. SAXS curves of a) C<sub>28</sub>-PEO3/5 1:1, b) C<sub>28</sub>-PEO3/20 1:7, c) C<sub>28</sub>-PEO5/10 1:1, d) C<sub>28</sub>-PEO5/10 1:2, e) C<sub>28</sub>-PEO5/20 1:1, f) C<sub>28</sub>-PEO5/20 1:4 as a function of temperature ranging from 20 °C to 60 °C at 0.5 vol% polymer concentration. Solid lines represent the model fits.

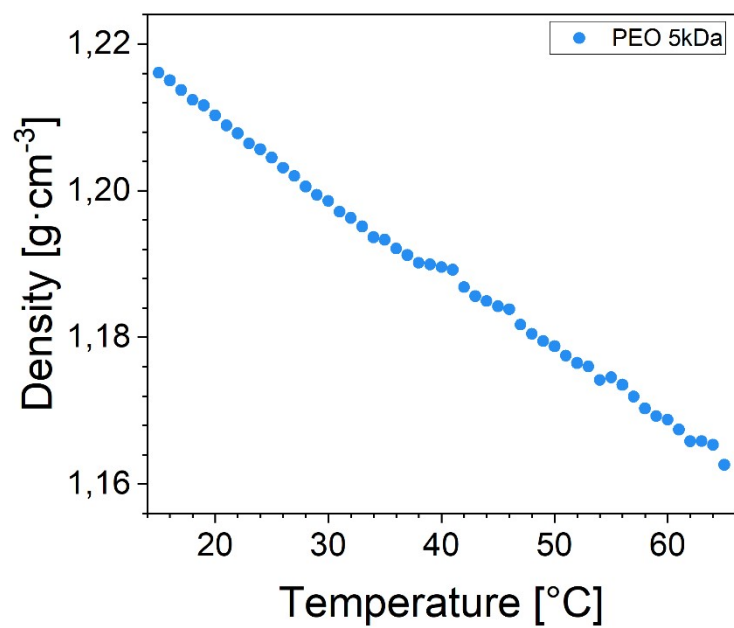

Figure S4. Density of poly(ethylene oxide),  $M_w = 5$  kDa, as a function of temperature

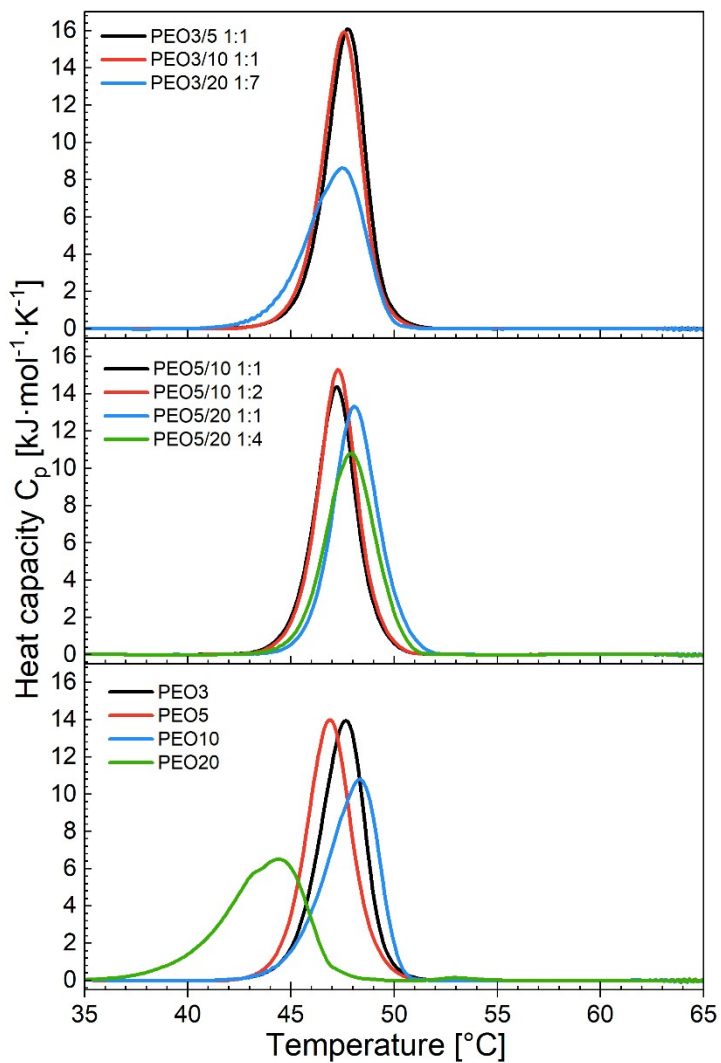

Figure S5. Temperature dependence of molar heat capacity  $C_p$  measured by DSC cooling run at a heating scan rate of 2 °C·min<sup>-1</sup>.
